# Supplementary material for: Electrochemical sensing of attomolar miRNA combining cascade strand displacement polymerization and reductant-mediated amplification
Source: Royal Society of Chemistry journal article supplement (doi:10.1039/c8cc03698e), 2018-01-01
Supplement: c8cc03698e1.pdf [file c8cc03698e1.pdf]

## Supporting Information

### Electrochemical sensing of attomolar miRNA combining cascade strand displacement polymerization and reductant-mediated amplification

Peng Miao,<sup>\*ab</sup> Yiting Jiang,<sup>ab</sup> Tian Zhang,<sup>ab</sup> Yue Huang,<sup>c</sup> and Yuguo Tang<sup>a</sup>

<sup>a</sup>Suzhou Institute of Biomedical Engineering and Technology, Chinese Academy of Sciences, Suzhou 215163, P. R. China

<sup>b</sup>University of Science and Technology of China, Hefei 230026, P. R. China

<sup>c</sup>College of Light Industry and Food Engineering, Nanjing Forest University, Nanjing 210037, P. R. China

E-mail: miaopeng@sibet.ac.cn (P. Miao).

## Experimental

### Materials and Chemicals

Ethylenediaminetetraacetic acid (EDTA), tris(2-carboxyethyl) phosphine hydrochloride (TCEP), mercaptohexanol (MCH), diethylpyrocarbonate (DEPC), trypsin, and hexaammineruthenium(III) chloride ( $[\text{Ru}(\text{NH}_3)_6]^{3+}$ ) were purchased from Sigma (USA). The other reagents were of analytical grade and were used as received without further purification. Klenow fragment polymerase, dNTP mixture, Nb.BssSI, Nt.BstNBI, Nb.BsmI, Nb.BsrDI and Nb.BbvCI nicking endonuclease were purchased from New England Biolabs Ltd. (Beijing, China). Quant One Step qRT-PCR Kit was purchased from Tiangen Biotech Co., Ltd. (Beijing, China). Human cervical cancer cell line (HeLa), human pulmonary carcinoma cell line (A549), human renal cubularepithelial cell line (HK-2), human breast adenocarcinoma cell line (MCF-7) were provided by the Institute of Biochemistry and Cell Biology, Chinese Academy of Sciences (Shanghai, China). Dulbecco's modified Eagle medium (DMEM) was purchased from Gibco (Gaithersburg, USA). Fetal bovine serum was from Hangzhou Sijiqing Biological Engineering Material Co., Ltd. (Hangzhou, China). All oligonucleotides and 20 bp DNA Ladder were obtained from Takara Biotechnology Co., Ltd. (Dalian, China). The sequences of DNA and RNA were shown in Table S1. Double-distilled water was purified with a Millipore system under 18 M $\Omega$  cm resistivity, which was treated with DEPC before use.

### Instruments

Electrochemical experiments were carried out on a CHI 660D electrochemical workstation (CH instruments, China). A three electrode system was applied, which included a saturated calomel reference electrode, a platinum wire counter electrode and a gold electrode as the working electrode.

Square wave voltammetry (SWV) measurements were performed with a step potential of 4 mV, a frequency of 70 Hz, and an amplitude of 25 mV by scanning the potential from 0.1 V to -0.6 V in working buffer solution (20 mM Tris-HCl, 160  $\mu$ M TCEP, 100 mM NaCl, 50 mM MgCl<sub>2</sub>, pH 7.4). Chronocoulometry (CC) was carried out in 10 mM Tris-HCl buffer solution containing 50  $\mu$ M [Ru(NH<sub>3</sub>)<sub>6</sub>]<sup>3+</sup>. The pulse period was set to be 250 ms. Electrochemical impedance spectroscopy (EIS) was conducted in 5 mM [Fe(CN)<sub>6</sub>]<sup>3-/4-</sup> with 1 M KNO<sub>3</sub>. The Bias potential was 0.215V, the amplitude was 5 mV and the frequency range was from 0.1 to 100000 Hz. All the experiments were run in triplicates. Polyacrylamide gel was photographed under UV light by Gel Doc™ XR+ Imaging System (Bio-Rad, USA). qRT-PCR experiments were performed on an ABI 7500 Real-Time PCR System (ABI Life Technologies, USA).

### **Working Electrode Cleaning**

The substrate gold electrode (2 mm) was pretreated according to a previous report.<sup>1</sup> Briefly, it was immersed in piranha solution (98% H<sub>2</sub>SO<sub>4</sub> : 30% H<sub>2</sub>O<sub>2</sub> = 3 : 1) for 5 min (*Caution: Piranha solution reacts violently with organic solvents and should be handled with great care!*). After rinsed with double-distilled water, it was polished to mirror-like surface using P5000 sand paper and 1, 0.3, 0.05  $\mu$ m alumina slurry, respectively. Next, the gold electrode was soaked in ethanol and then double-distilled water with ultra-sonicating process. Subsequently, it was incubated with 50% HNO<sub>3</sub> for 30 min and then electrochemically cleaned with 0.5 M H<sub>2</sub>SO<sub>4</sub> so as to remove any remaining impurities. It was then carefully rinsed and dried with nitrogen. The cleaned gold electrode was incubated with DNA probe d (1  $\mu$ M, 10 mM Tris-HCl, 1 mM EDTA, 10 mM TCEP, 0.1 M NaCl, pH 7.4) for 8 h.<sup>2</sup> Subsequently, it was rinsed and treated with 0.1 M MCH for 30 min.<sup>3</sup>

### **MiRNA-Triggered Cascade Strand Displacement Polymerization**

MiRNA standard solutions were firstly prepared with a series of concentrations. Isothermal polymerization and nicking reaction solution was prepared with 0.2  $\mu\text{L}$  Klenow fragment, 0.3  $\mu\text{L}$  Nb.BbvCI, 2.5  $\mu\text{L}$  dNTPs (2.5 mM), 1.0  $\mu\text{L}$  DNA probe a (5.0  $\mu\text{M}$ ), 5  $\mu\text{L}$  miRNA, 1.0  $\mu\text{L}$  10 $\times$ NEB buffer 2.1. The final volume of the reaction solution was 10  $\mu\text{L}$ , which was dipped on the DNA probe d modified electrode surface at 37  $^{\circ}\text{C}$  for 2 h. After that, the enzymes are inactivated by heating to 80  $^{\circ}\text{C}$  for 20 min. The electrodes were carefully rinsed and then electrochemically measured with the amplification of TCEP.

### Cell Culture and Lysis

HeLa, A549, HK-2, and MCF-7 cells were cultured in DMEM medium with the addition of 10% fetal bovine serum (v/v) in 5%  $\text{CO}_2$  atmosphere. The culture temperature was set to be 37 $^{\circ}\text{C}$ . After the cells reached a confluence of more than 80%, the four cells were detached by trypsin and washed with phosphate buffered saline. The collected cells were then seeded in 96-well plate. The concentrations were about 10000 cells per well. Cell lysates were obtained by applying SingleShot<sup>TM</sup> Cell Lysis Kit according to the manufacturer's procedure, which were then analyzed by the proposed electrochemical biosensor and qRT-PCR method.

### References

1. X. F. Chen, Z. Z. Guo, Y. G. Tang, Y. Shen and P. Miao, *Anal. Chim. Acta*, 2018, **999**, 54-59.
2. P. Miao, L. M. Ning and X. X. Li, *Anal. Chem.*, 2013, **85**, 7966-7970.
3. R. J. Lao, S. P. Song, H. P. Wu, L. H. Wang, Z. Z. Zhang, L. He and C. H. Fan, *Anal. Chem.*, 2005, **77**, 6475-6480.
4. Y. Liu, T. Shen, J. Li, H. Gong, C. Y. Chen, X. M. Chen and C. Q. Cai, *ACS Sens.*, 2017, **2**,

1430-1434.

5. D. Zhu, W. Liu, D. X. Zhao, Q. Hao, J. Li, J. X. Huang, J. Y. Shi, J. Chao, S. Su and L. H. Wang, *ACS Appl. Mater. Interfaces*, 2017, **9**, 35597-35603.
6. Y. Y. Tao, D. Yin, M. C. Jin, J. Fang, T. Dai, Y. Li, Y. X. Li, Q. L. Pu and G. M. Xie, *Biosens. Bioelectron.*, 2017, **96**, 99-105.
7. M. K. Masud, M. N. Islam, M. H. Haque, S. Tanaka, V. Gopalan, G. Alici, N. T. Nguyen, A. K. Lam, M. S. A. Hossain, Y. Yamauchi and M. J. A. Shiddiky, *Chem. Commun.*, 2017, **53**, 8231-8234.
8. L. D. Wang, R. J. Deng and J. H. Li, *Chem. Sci.*, 2015, **6**, 6777-6782.
9. P. Miao, Y. G. Tang, B. D. Wang and F. Y. Meng, *Anal. Chem.*, 2016, **88**, 7567-7573.
10. X. J. Fan, Y. Qi, Z. Y. Shi, Y. K. Lv and Y. J. Guo, *Sens. Actuator B-Chem.*, 2018, **255**, 1582-1586.
11. W. Li, T. Hou, M. Wu and F. Li, *Talanta*, 2016, **148**, 116-121.
12. K. Shi, B. T. Dou, C. Y. Yang, Y. Q. Chai, R. Yuan and Y. Xiang, *Anal. Chem.*, 2015, **87**, 8578-8583.
13. W. Shen, H. M. Deng, Y. Q. Ren and Z. Q. Gao, *Chem. Commun.*, 2013, **49**, 4959-4961.
14. H. Wang, Y. N. Jian, Q. K. Kong, H. Y. Liu, F. F. Lan, L. L. Liang, S. G. Ge and J. H. Yu, *Sens. Actuator B-Chem.*, 2018, **257**, 561-569.
15. P. Zhang, X. Y. Wu, R. Yuan and Y. Q. Chai, *Anal. Chem.*, 2015, **87**, 3202-3207.
16. P. Zhang, Z. Y. Li, H. J. Wang, Y. Zhuo, R. Yuan and Y. Q. Chai, *Nanoscale*, 2017, **9**, 2310-2316.

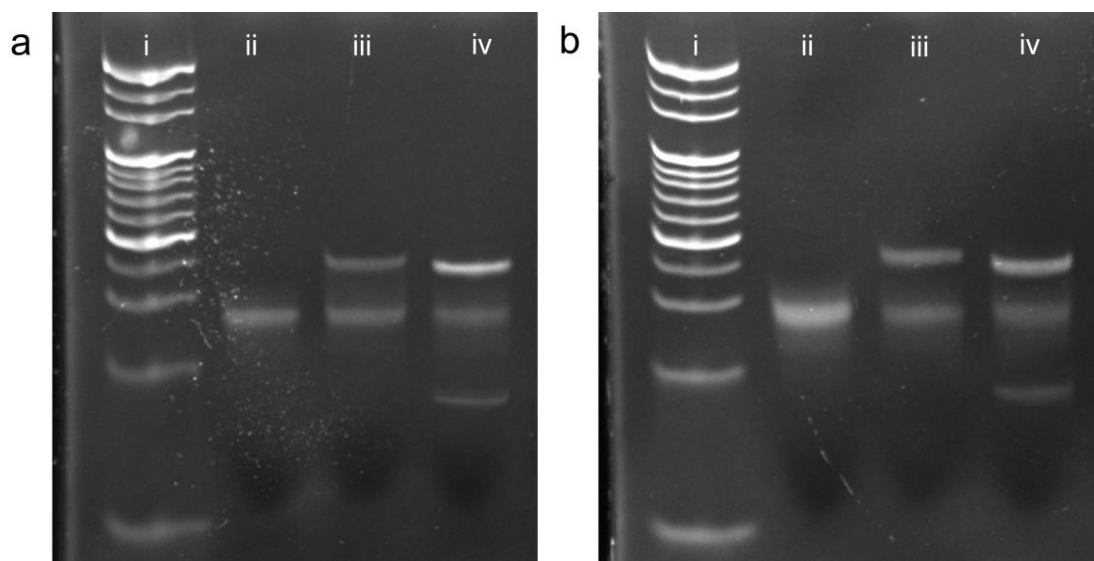

**Fig. S1** Polyacrylamide gel electrophoresis analysis of oligonucleotides in this work. (a): (i) 20 bp DNA Ladder, (ii) DNA probe a, (iii) DNA duplex formed by DNA probe a and b, (iv) the previous DNA duplex in the presence of Klenow fragment and Nb.BbvCI. (b): (i) 20 bp DNA Ladder, (ii) DNA probe d, (iii) DNA duplex formed by DNA probe c and d, (iv) the previous DNA duplex in the presence of Klenow fragment and Nb.BbvCI.

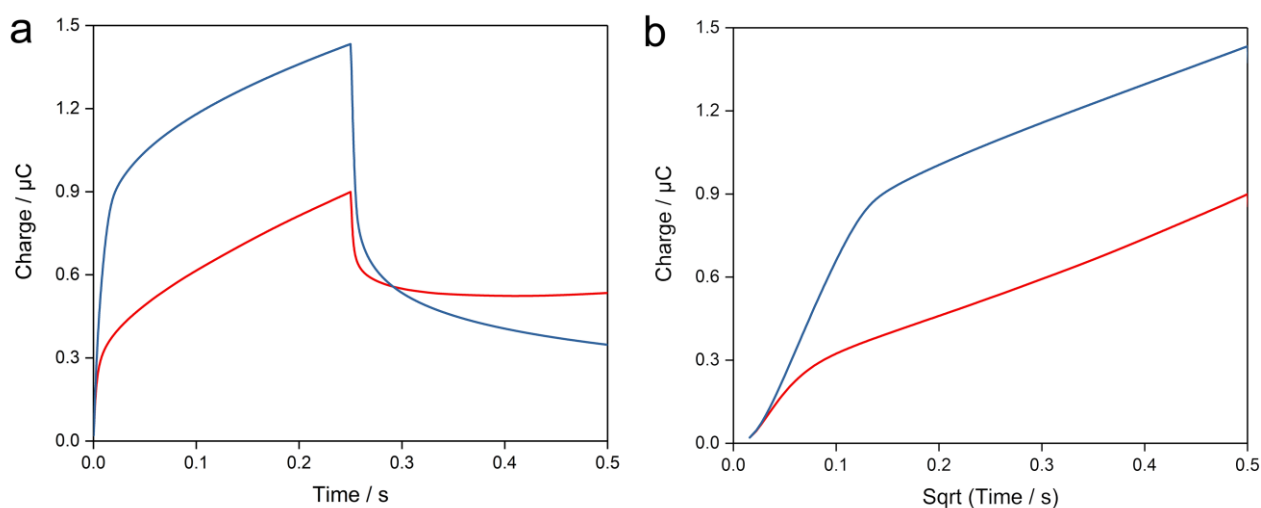

**Fig. S2** (a) Chronocoulometry curves for the electrode modified with MCH (bottom) and DNA probe d before MCH (top). (b) Chronocoulometry curves of charge versus  $t^{1/2}$ .

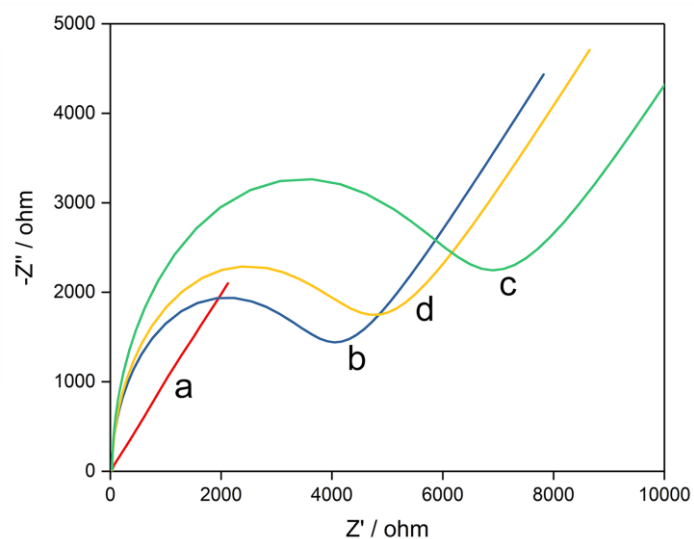

**Fig. S3** Nyquist plots corresponding to (a) bare gold electrode, (b) DNA probe d modified electrode, (c) after miRNA-initiated cascade strand displacement polymerization in the presence of DNA probe a, (d) DNA probe d modified electrode after incubation with DNA probe c.

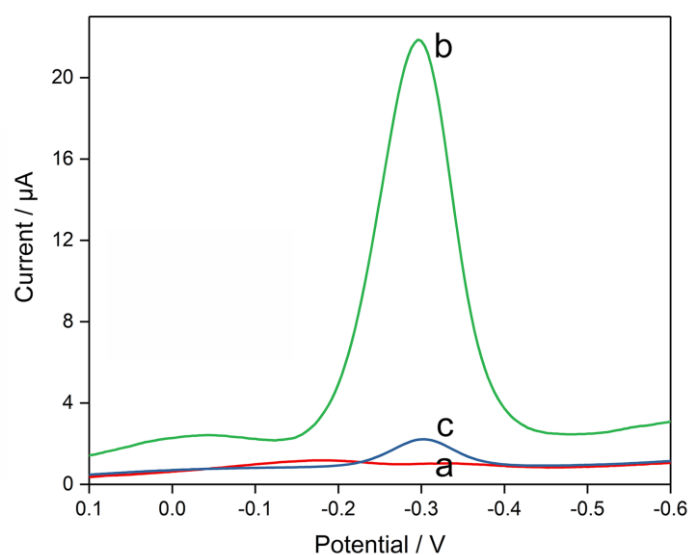

**Fig. S4** Square wave voltammograms of (a) bare gold electrode, (b) DNA probe d modified electrode, (c) after miRNA-initiated cascade strand displacement polymerization ( $10^{-12}$  M).

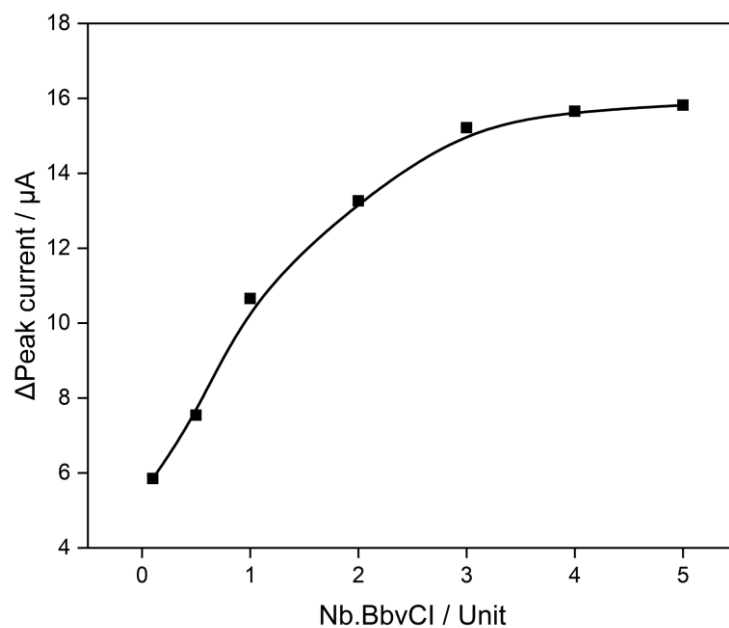

**Fig. S5** Optimization of the amount of Nb.BbvCI used for DNA cleavage.

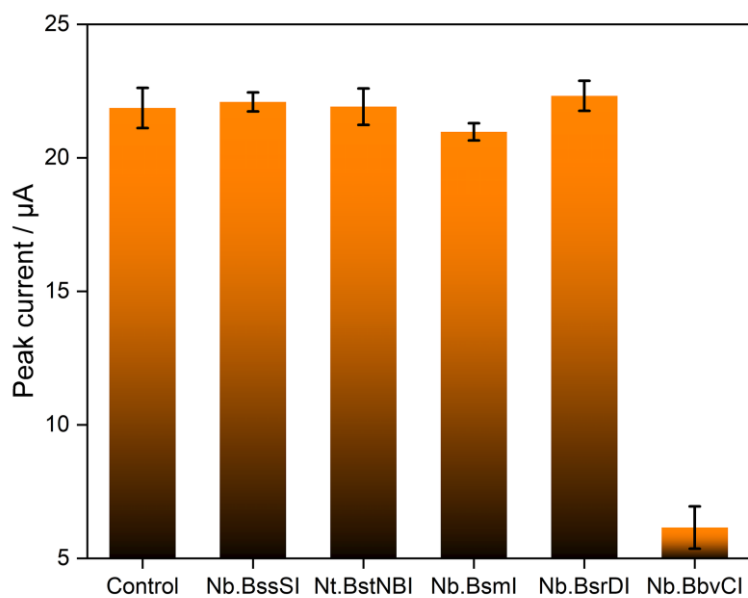

**Fig. S6** Peak currents of the square wave voltammograms for the detection of 1 fM miRNA in the absence and presence of Nb.BssSI, Nt.BstNBI, Nb.BsmI, Nb.BsrDI and Nb.BbvCI nicking endonucleases, respectively.



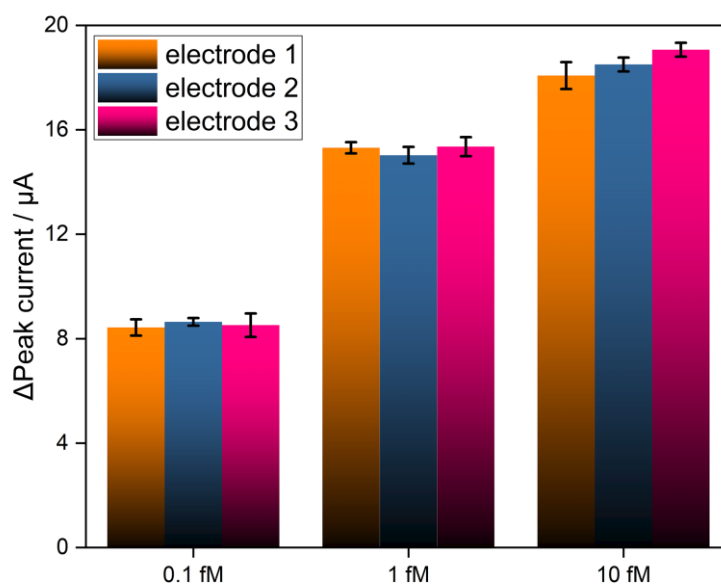

**Fig. S7** Reproducibility of the proposed electrochemical biosensor in different concentrations.

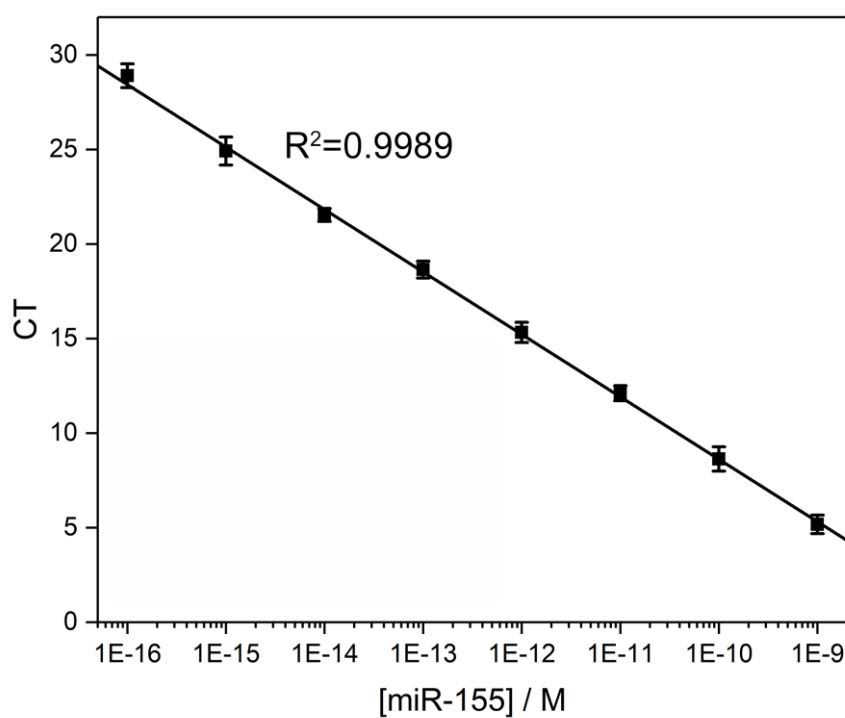

**Fig. S8** Standard curve of qRT-PCR for 10-fold dilution series ranging from  $10^{-16}$  to  $10^{-9}$  M of synthetic miR-155. Standard deviations are obtained from three independent measurements.

**Table S1** DNA and RNA sequences used in this work.<sup>a</sup>

| Name        | Sequence (5' to 3')                                                                                              |
|-------------|------------------------------------------------------------------------------------------------------------------|
| DNA probe a | ACTAGCTAAGGCATCATAGGTATCTAGCTAAAGCCCTCAGCACCCC<br>TATCACGATTAGCATTA                                              |
| DNA probe b | TGAGGTTAATGCTAATCGTGATAGGGGT                                                                                     |
| DNA probe c | TGAGGGCTTTAGCTAGATACCTATGATGCCTTAGCTAGT                                                                          |
| DNA probe d | MB-ACCCCTATCACGATTAGCATTAACCTCAGCACTAGCTAAGGCA<br>TCATAGGTATCTAGCTAAAGCCCTCA-(CH <sub>2</sub> ) <sub>6</sub> -SH |
| miR-155     | UUA AUGCUAAUCGUGAUAGGGGU                                                                                         |
| mismatch 1  | <u>A</u> UUA AUGCUAAUCGUGAUAGGGGU                                                                                |
| mismatch 2  | <u>ACA</u> AUGCUAAUCGUGAUAGGGGU                                                                                  |
| mismatch 3  | UUA AUGCUAAUCGUGAUAGGG <u>G</u>                                                                                  |
| mismatch 4  | UUA AUGCUAAUCGUGAUAGGG <u>AG</u>                                                                                 |
| mismatch 5  | UUA AUGCUAAU <u>GG</u> UGAUAGGGGU                                                                                |
| mismatch 6  | UUA AUGCUAAU <u>GC</u> UGAUAGGGGU                                                                                |

<sup>a</sup>The blue and green colored sequences are the same or complementary sequences. The black colored sequences of DNA probes are parts of restriction sites of Nb.BbvCI nicking endonuclease. The underlined parts of mismatched miRNAs represent the mismatch sites which cover 5' end, 3' end and middle sections of the sequences

**Table S2** Comparison of the analytical performances of recent miRNA assays.

| Technique                | Strategy                                                                     | Detection range<br>(M)                     | LOD (M)               | Ref.      |
|--------------------------|------------------------------------------------------------------------------|--------------------------------------------|-----------------------|-----------|
| fluorescence             | ratiometric probe with catalyzed hairpin assembly                            | $5 \times 10^{-10}$ to $5 \times 10^{-8}$  | $7.2 \times 10^{-11}$ | 4         |
| electrochemistry         | thionine and gold nanoparticles co-functionalized MoS <sub>2</sub> nanosheet | $10^{-12}$ to $10^{-8}$                    | $2.6 \times 10^{-13}$ | 5         |
| electrochemistry         | Double-loop hairpin probe and doxorubicin-loaded gold nanoparticles          | $10^{-12}$ to $10^{-8}$                    | $1.7 \times 10^{-13}$ | 6         |
| electrochemistry         | gold-loaded nanoporous superparamagnetic nanocubes                           | $10^{-13}$ to $10^{-6}$                    | $10^{-13}$            | 7         |
| fluorescence             | target-fueled DNA walker                                                     | $10^{-13}$ to $10^{-9}$                    | $5.8 \times 10^{-14}$ | 8         |
| fluorescence             | near-infrared Ag <sub>2</sub> S quantum dots-based logic gate                | $10^{-16}$ to $10^{-11}$                   | $1.2 \times 10^{-14}$ | 9         |
| fluorescence             | helicase-assisted hybridization chain reaction                               | $10^{-14}$ to $2 \times 10^{-12}$          | $4.2 \times 10^{-15}$ | 10        |
| fluorescence             | isothermal exponential amplification and graphene oxide                      | $10^{-14}$ to $10^{-11}$                   | $3 \times 10^{-15}$   | 11        |
| electrochemistry         | enzyme-free target recycling signal amplification                            | $5 \times 10^{-15}$ to $5 \times 10^{-10}$ | $1.4 \times 10^{-15}$ | 12        |
| colorimetry              | gold nanoparticles and duplex specific nuclease                              | $2 \times 10^{-15}$ to $10^{-12}$          | $10^{-15}$            | 13        |
| electrochemistry         | gold nanoparticles@copper metal-organic frameworks                           | $10^{-15}$ to $10^{-8}$                    | $3.5 \times 10^{-16}$ | 14        |
| electrochemiluminescence | DNAzyme and rolling circle amplification                                     | $10^{-15}$ to $10^{-10}$                   | $3 \times 10^{-16}$   | 15        |
| electrochemiluminescence | the assembly of the DNA tweezer                                              | $10^{-16}$ to $10^{-11}$                   | $3 \times 10^{-17}$   | 16        |
| electrochemistry         | cascade strand displacement polymerization                                   | $10^{-17}$ to $5 \times 10^{-15}$          | $3.2 \times 10^{-18}$ | this work |

**Table S3** Electrochemical detection of miRNA added in human serum samples.

| Sample | Added (fM) | Found (fM) | Recovery (%) | RSD (%) |
|--------|------------|------------|--------------|---------|
| 1      | 10         | 10.15      | 101.5        | 4.12    |
| 2      | 50         | 49.21      | 98.42        | 3.55    |
| 3      | 100        | 104.51     | 104.51       | 3.24    |
| 4      | 500        | 510.26     | 102.05       | 4.73    |
| 5      | 1000       | 978.30     | 97.83        | 3.71    |
